# Supplementary material for: Antibody-catalyzed hydrolysis of oligomeric esters: a model for the degradation of polymeric materials
Source: Royal Society of Chemistry journal article supplement (doi:10.1039/b008065i), 2001-01-01
Supplement: b008065i.doc [file b008065i.doc]

**Antibody-Catalyzed Hydrolysis of Oligomeric Esters: A Model for the Degradation of Polymeric Materials**

Oliver Brümmer, Timothy Z. Hoffman, Da-Wei Chen, Kim D. Janda*

*Department of Chemistry, The Scripps Research Institute and The Skaggs Institute for Chemical Biology, 10550 North Torrey Pines Road, La Jolla, CA 92037*

**SUPPLEMENTARY INFORMATION**

**Chemical Synthesis:**

*General Procedures:* All commercially available chemicals were used without further purification. All moisture- and air-sensitive reactions were carried out under a dry nitrogen atmosphere with dry reagents and solvents in flame-dried round bottom flasks. All solvents were dried and distilled by standard procedures prior to using. Analytical thin layer chromatography (TLC) was performed using 0.25 mm silica gel coated Kieselgel 60 F254 plates. Visualization of the chromatogram was by UV absorbance, ninhydrin and *p*-anisaldehyde. Liquid chromatography was performed using compressed air (flash chromatography) with the indicated solvent system and silica gel 60 (230-400 mesh). Preparative TLC was performed using Merck 1 mm coated silica gel Kieselgel 60 F254 plates. 1H NMR spectra were recorded on a Bruker AMX-400 spectrometer. Chemical shifts are reported in parts per million (ppm) on the  scale from an internal standard. 13C NMR (proton decoupled) were recorded on a Bruker AMX-400 spectrometer at 100 MHz. High-resolution mass spectra (HRMS) were recorded on a VG ZAB-VSE mass spectrometer. Analytical HPLC was performed on a Hitachi 655A series HPLC using a Vydac 201TP54 reversed phase column.

Scheme **A**:

*Synthesis of* **3-Bn**: A mixture of 4-hydroxyphenylacetic acid **3** (1.895 g, 12.47 mmol), 1,8-diazabicyclo[5.4.0]undec-7-ene (DBU) (1.88 mL, 12.6 mmol) and benzylbromide (1.54 mL, 13 mmol) in acetonitrile (25 mL) was refluxed for 16 h. The mixture was then poured into 1M HCl, extracted with ethyl acetate, and the organic phase was collected and extracted consecutively with water, 1M NaOH, water, brine and dried with Na2SO4. Evaporation of the solvent gave a residue which was purified by column chromatography (methylene chloride:methanol - 20:1) on silica gel to afford the benzyl ester of **3**, **3-Bn**, (2.253 g, 9.31 mmol, 75% yield) as a white solid. 1H NMR (400 MHz, CD3OD):  = 7.30-7.26 (5H, m), 7.06 (2H, d, *J* = 8.0 Hz), 6.72 (2H, d, *J* = 8.0 Hz), 5.08 (2H, s), 3.30 (2H, s); 13C NMR (100 MHz, CD3OD):  = 173.7, 157.6, 137.5, 131.4, 129.5, 129.1, 129.0, 126.2, 116.2, 67.4, 41.1; HR-MS: calcd. for C15H14O3[Na+]: 265.0835, found: 265.0828.

*Synthesis of* **TBDMS-3**: A solution of the **3-Bn** (3.512 g, 14.51 mmol), *tert*-butyldimethylsilyl chloride (TBDMS-Cl) (2.23 g mL, 14.8 mmol) and imidazole (1.01 g, 14.8 mmol) in dry *N,N*-dimethylformamide (*N,N*-DMF) (10 mL) was stirred under an atmosphere of argon for 4h. The mixture was then poured into 1M NaOH, extracted with ethyl acetate, and the organic phase was collected and extracted consecutively with water, 50% NaCl in water, brine and dried with Na2SO4. Evaporation of the solvent gave a residue which was purified by column chromatography (ethyl acetate:hexanes - 1:10) on silica gel to afford **TBDMS-3-Bn** (5.105 g, 14.34 mmol, 98% yield) as a yellow oil. Pd/C (350 mg) was added to a solution of **TBDMS-3-Bn** (5.105 g, mmol) in methanol (10 mL) and ethyl acetate (5 mL). After stirring under an atmosphere of H2 for 4h, the mixture was filtered and the solvent evaporated to afford **TBDMS-3** ( 3.69 g, 13.87 mmol, 97% yield) as a white solid. 1H NMR (400 MHz, CDCl3):  = 7.13 (2H, dt, *J* = 8.5 Hz, 2 Hz), 6.78 (2H, dt, *J* = 8.5 Hz, 2 Hz), 3.56 (2H, s), 0.96 (9H, s), 0.17 (6H, s).

*Synthesis of* **TBDMS-8-Bn**: A solution of **3-Bn** (236 mg, 0.976 mmol), **TBDMS-3** (260 mg, 0.976 mmol), EDC (210 mg, 1.1 mmol), HOBT (144 mg, 1.1 mmol) and DIPEA (350 µL, 2 mmol) in dry THF (10 mL) were stirred at room temperature for 2 h. The solvent was evaporated and the crude product was purified by column chromatography (ethyl acetate:hexanes - 1:5) on silica gel to afford **TBDMS-8-Bn** (365 mg, 0.7443 mmol, 76% yield) as a white solid. 1H NMR (400 MHz, CDCl3):  = 7.40-7.23 (9H, m), 7.04 (2H, dt, *J* = 9.0 Hz, 1.5 Hz), 6.85 (2H, dt, *J* = 9.0 Hz, 1.5 Hz), 5.14 (2H, s), 3.79 (2H, s), 3.66 (2H, s), 1.01 (9H, s), 0.22 (6H, s); 13C NMR (100 MHz, CD3OD + CDCl3):  = 171.1, 170.2, 154.9, 149.8, 135.7, 131.4, 130.2, 128.5, 128.1, 126.0, 121.5, 120.2, 66.7, 40.6, 40.5, 25.6, 18.2, 4.5; HR-MS: calcd. for C29H34O5Si[Na+]: 513.2068, found: 513.2073.

*Synthesis of* **8**: Pd/C (60 mg) was added to a solution of **TBDMS-8-Bn** (690 mg, 1.408 mmol) in methanol (5 mL) and ethyl acetate (5 mL). After stirring under an atmosphere of H2 for 2h, the mixture was filtered and the solvent evaporated to afford **TBDMS-8** ( 568 mg, 1.422 mmol, 99% yield) as a white solid. To a solution of **TBDMS-8** (50 mg, 0.125 mmol) in dry THF (5 mL) was added tetrabutylammonium fluoride (1 mmol in THF, 125 µL, 0.125 mmol) at -78C. The mixture was then poured into saturated aqueous NH4Cl, extracted with ethyl acetate, and the organic phase was collected and extracted consecutively with water, brine and dried with Na2SO4. Evaporation of the solvent gave a residue which was purified by column chromatography (methylene chloride:methanol - 10:1) on silica gel to afford **8** (32 mg, 0.112 mmol, 90% yield) as a white solid. 1H NMR (400 MHz, CD3OD):  = 7.28 (2H, d, *J* = 8.5 Hz), 7.17 (2H, d, *J* = 8.5 Hz), 6.99 (2H, d, *J* = 8.5 Hz), 6.76 (2H, dt, *J* = 8.5 Hz, 2 Hz),13C NMR (100 MHz, CD3OD):  = 175.3, 172.5, 157.8, 151.3, 133.8, 131.5, 131.4, 125.9, 122.6, 116.4, 41.2, 41.0; HR-MS: calcd. for C16H14O5[Na+]: 309.0733, found: 309.0731.

Scheme **B**:

*Synthesis of* **7**: A solution of 4-acetimidophenylacetic acid **5** (900 mg, 4.66 mmol), **3-Bn** (1.127 g, 4.66 mmol), 1-(3-dimethylaminopropyl)-3-ethylcarbodiimide hydrochloride (EDC) (955 mg, 5 mmol), 1-hydroxybenzotriazole hydrate (HOBT) (675 mg, 5 mmol) and *N*,*N*-diisopropylethylamine (DIPEA) (1.7 mL, 10 mmol) in dry THF (20 mL) was stirred at room temperature for 4 h. The mixture was then poured into saturated aqueous NH4Cl, extracted with ethyl acetate, and the organic phase was collected and extracted consecutively with water, brine and dried with Na2SO4. Evaporation of the solvent gave a residue which was purified by column chromatography (methylene chloride:methanol - 20:1) on silica gel to afford the benzyl ester of **7**, **7-Bn**, (1.749 g, 4.194 mmol, 90% yield) as a white solid. 1H NMR (400 MHz, CDCl3):  = 7.53 (2H, d, *J* = 9.0 Hz), 7.35-7.20 (9H, m), 6.95 (2H, d, *J* = 9.0 Hz), 5.08 (2H, s), 3.82 (2H, s), 3.65 (2H, s), 2.10 (3H, s); 13C NMR (100 MHz, CDCl3):  = 172.9, 172.0, 171.6, 151.3, 139.0, 137.4, 133.3, 131.4, 130.9, 129.5, 129.2, 129.1, 122.6, 121.3, 116.2, 67.6, 41.2, 23.8; HR-MS: calcd. for C25H23O5N[Na+]: 440.1468, found: 440.1465. Pd/C (150 mg) was added to a solution of **7-Bn** (1.364 g, 3.27 mmol) in methanol (10 mL). After stirring under an atmosphere of H2 for 2h, the mixture was filtered and the solvent evaporated to afford **7** (1.003 g, 3.07 mmol, 95% yield) as a white solid. 1H NMR (400 MHz, CD3OD + CDCl3):  = 7.51 (2H, dt, *J* = 9.0 Hz, 1.5 Hz), 7.29 (2H, dt, *J* = 9.0 Hz, 1.5 Hz), 7.25 (2H, dt, *J* = 9.0 Hz, 1.5 Hz), 6.97 (2H, dt, *J* = 9.0 Hz, 1.5 Hz), 3.80 (2H, s), 3.56 (2H, s), 2.10 (3H, s); 13C NMR (100 MHz, CD3OD + CDCl3):  = 174.7, 171.5, 171.1, 150.5, 138.4, 137.4, 133.0, 131.0, 130.3, 129.9, 122.1, 121.0, 115.9, 41.1, 41.0, 23.8; HR-MS: calcd. for C18H17O5N[Na+]: 350.0999, found: 350.1003.

*Synthesis of* **6**: A solution of **7** (723 mg, 2.21 mmol), **3-Bn** (535 g, 2.21 mmol), EDC (458 mg, 2.4 mmol), HOBT (324 mg, 2.4 mmol) and DIPEA (850 µL, 5 mmol) in dry THF (20 mL) was stirred for 3h. The mixture was then poured into saturated aqueous NH4Cl, extracted with ethyl acetate, and the organic phase was collected and extracted consecutively with water, brine and dried with Na2SO4. The crude product was purified by column chromatography (methylene chloride) on silica gel to afford the benzyl ester of **6**, **6-Bn**, (1.13 g, 2.05 mmol, 93% yield) as a white solid. 1H NMR (400 MHz, CDCl3):  = 7.50 (2H, d, *J* = 9.0 Hz), 7.35-7.20 (11H, m), 7.10 (2H, d, *J* = 9.0 Hz), 7.05 (2H, d, *J* = 9.0 Hz), 5.16 (2H, s), 3.85 (2H, s), 3.83 (2H, s), 3.67 (2H, s), 2.03 (3H, s); 13C NMR (100 MHz, CDCl3):  = 172.0, 171.1, 170.1, 169.7, 155.5, 149.7, 137.1, 135.5, 135.3, 131.3, 130.7, 130.1, 129.5, 128.7, 128.3, 128.0, 127.9, 121.5, 120.0, 115.3, 66.4, 40.4, 40.3, 40.2, 23.8; HR-MS: calcd. for C33H29O7N[Na+]: 574.1836, found: 574.1836. Pd/C (60 mg) was added to a solution of **6-Bn** (613 mg, 1.11 mmol) in methanol (5 mL) and methylene chloride (2 mL). After stirring under an atmosphere of H2 for 2h, the mixture was filtered and the solvent evaporated to afford **6** (470 mg, 1.02 mmol, 92% yield) as a white solid. 1H NMR (400 MHz, CD3OD + CDCl3):  = 7.50 (2H, d, *J* = 9.0 Hz), 7.34 (2H, d, *J* = 9.0 Hz), 7.28 (2H, d, *J* = 9.0 Hz), 7.24 (2H, d, *J* = 9.0 Hz), 7.02 (2H, d, *J* = 9.0 Hz), 6.95 (2H, d, *J* = 9.0 Hz), 3.82 (2H, s), 3.80 (2H, s), 3.55 (2H, s), 2.09 (3H, s); 13C NMR (100 MHz, CD3OD + CDCl3):  = 173.6, 170.3, 170.0, 169.9, 149.5, 149.1, 137.2, 131.8, 130.7, 129.9, 129.2, 128.5, 121.2, 120.9, 119.9, 41.1, 41.0, 22.9; HR-MS: calcd. for C26H23O7N[Na+]: 484.1367, found: 484.1386. HPLC-trace: 6 min for **6** when eluted with 45% acetonitrile / water containing 0.1% TFA (flow = 1.0 ml/min, =276 nm).

*Synthesis of* **4**: A solution of **6** (525 mg, 1.139 mmol), **3-Bn** (276 g, 1.139 mmol), EDC (287 mg, 1.5 mmol), HOBT (203 mg, 1.5 mmol) and DIPEA (520 µL, 3 mmol) in dry THF (10 mL) and dry *N*,*N*-DMF (1 mL) was stirred for 18h. The mixture was then poured into saturated aqueous NH4Cl, extracted with ethyl acetate, and the organic phase was collected and extracted consecutively with water, brine and dried with Na2SO4. The crude product was purified by column chromatography (methylene chloride:ethyl acetate - 10:1) on silica gel to afford the benzyl ester of **4**, **4-Bn**, (400 mg, 0.581 mmol, 51% yield) as a white solid. 1H NMR (400 MHz, CDCl3):  = 7.60-7.45 (2H, m), 7.45-7.2 (13H, m), 7.1-6.9 (6H, m), 5.12 (2H, s), 3.83 (6H, s), 3.64 (2H, s), 2.10 (3H, s); 13C NMR (100 MHz, CDCl3):  = 171.0, 170.1, 169.7, 168.8, 149.8, 149.7, 149.5, 137.3, 135.5, 131.4, 130.8, 130.2, 129.6, 128.7, 128.4, 128.1, 128.0, 121.5, 121.4, 120.0, 66.6, 40.5, 24.1; HR-MS: calcd. for C41H35O9N[Na+]: 708.2204, found: 708.2204. Pd/C (40 mg) was added to a solution of **4-Bn** (367 mg, 0.536 mmol) in methanol (5 mL) and methylene chloride (2 mL). After stirring under an atmosphere of H2 for 2h, the mixture was filtered and the solvent evaporated to afford **4** (295 mg, 0.435 mmol, 81% yield) as a white solid. 1H NMR (400 MHz, CD3OD + CDCl3):  = 7.52 (2H, d, *J* = 9.0 Hz), 7.36 (2H, d, *J* = 9.0 Hz), 7.32 (2H, d, *J* = 9.0 Hz), 7.28 (2H, d, *J* = 9.0 Hz), 7.07 (2H, d, *J* = 9.0 Hz), 7.03 (4H, d, *J* = 9.0 Hz), 6.96 (2H, d, *J* = 9.0 Hz), 3.87 (2H, s), 3.85 (2H, s), 3.83 (2H, s), 3.52 (2H, s), 2.11 (3H, s); HR-MS: calcd. for C34H29O9N[Na+]: 618.1735, found: 618.1739. HPLC-trace: 11 min for **4** when eluted with 45% acetonitrile / water containing 0.1% TFA (flow = 1.0 ml/min, =276 nm).

*Synthesis of* **10**: A solution of **4** (579 mg, 0.973 mmol), **3-Bn** (235 mg, 0.973 mmol), EDC (287 mg, 1.5 mmol), HOBT (202 mg, 1.5 mmol) and DIPEA (520 µL, 3 mmol) in dry THF (10 mL) and dry *N*,*N*-DMF (1 mL) was stirred for 4h. The solvent was evaporated and the crude product was purified by column chromatography (methylene chloride:ethyl acetate - 10:1) on silica gel to afford the benzyl ester of **10**, **10-Bn**, (51 mg, 0.062 mmol,16% yield) as a white solid. 1H NMR (400 MHz, CD3OD + CDCl3):  = 7.47 (2H, d, *J* = 9.0 Hz), 7.36-7.22 (15H, m), 7.03 (6H, d, *J* = 9.0 Hz), 6.97 (2H, d, *J* = 9.0 Hz), 5.08 (2H, s), 3.81 (4H, s), 3.80 (2H, s), 3.78 (2H, s), 3.61 (2H, s), 2.06 (3H, s); 13C NMR (100 MHz, CD3OD + CDCl3):  = 171.2, 170.2, 169.8, 169.2, 149.8, 149.7, 149.6, 137.3, 135.5, 131.4, 130.9, 130.8, 130.2, 129.6, 128.7, 128.4, 128.2, 128.0, 121.5, 121.4, 119.3, 66.6, 40.5, 23.9; HR-MS: calcd. for C49H41O11N[Na+]: 842.2572, found: 842.2585. Pd/C (10 mg) was added to a solution of **10-Bn** (99 mg, 0.121 mmol) in methanol (3 mL), ethyl acetate (3 mL) and methylene chloride (3 mL). After stirring under an atmosphere of H2 for 4h, the mixture was filtered in the presence of 1% of triethylamine and the solvent evaporated to afford **10** (84 mg, 0.115 mmol, 95% yield) as a white solid. 1H NMR (400 MHz, *d*6-DMSO):  = 7.55 (2H, d, *J* = 9.0 Hz), 7.42 (6H, d, *J* = 9.0 Hz), 7.27 (2H, d, *J* = 9.0 Hz), 7.28 (2H, d, *J* = 9.0 Hz), 7.12 (4H, d, *J* = 9.0 Hz), 7.10 (2H, d, *J* = 9.0 Hz), 7.05 (2H, d, *J* = 9.0 Hz), 3.99 (4H, s), 3.98 (2H, s), 3.89 (2H, s), 3.55 (2H, s), 2.03 (3H, s); HR-MS: calcd. for C42H35O11N[Na+]: 752.2102, found: 752.2118. HPLC-trace: 26 min for **10** when eluted with 45% acetonitrile / water containing 0.1% TFA (flow = 1.0 ml/min, =276 nm).

*Synthesis of* **11**: A solution of **10** (53 mg, 0.0722 mmol), **3-Bn** (18 mg, 0.0722 mmol), EDC (19 mg, 0.1 mmol), HOBT (14 mg, 0.1 mmol) and DIPEA (35 µL, 0.2 mmol) in dry THF (2 mL) and dry *N*, *N* DMF (0.5 mL) was stirred for 3h. The solvent was evaporated and the crude product was purified by column chromatography (methylene chloride:ethyl acetate - 10:1) on silica gel to afford the benzyl ester of **11**, **11-Bn**, (14 mg, 0.0147 mmol, 20% yield) as a white solid. Pd/C (3 mg) was added to a solution of **11-Bn** (14 mg, 0.0147 mmol) in methanol (1 mL), ethyl acetate (1 mL) and methylene chloride (1 mL). After stirring under an atmosphere of H2 for 2h, the mixture was filtered in the presence of 1% of triethylamine, the solvent was evaporated and the crude product was purified by preparative TLC (methylene chloride:methanol - 10:1) to afford **11** (5 mg, 0.0058 mmol, 40% yield) as a white solid. 1H NMR (400 MHz, *d*6-DMSO):  = 7.55 (2H, d, *J* = 8.0 Hz), 7.42 (8H, d, *J* = 8.0 Hz), 7.28 (4H, d, *J* = 8.0 Hz), 7.15-7.08 (8H, m), 7.05 (2H, d, *J* = 8.0 Hz), 3.98 (8H, s), 3.89 (2H, s), 3.57 (2H, s), 2.03 (3H, s); HR-MS: calcd. for C50H41O13N[Na+]: 886.247, found: 886.2482. HPLC-trace: 35 min for **11** when eluted with 47% acetonitrile / water containing 0.1% TFA (flow = 1.3 ml/min, =276 nm).

*Synthesis of* **12**: A solution of **10** (46 mg, 0.0641 mmol), **8-Bn** (33 mg, 0.1 mmol), EDC (19 mg, 0.1 mmol), HOBT (14 mg, 0.1 mmol) and DIPEA (35 µL, 0.2 mmol) in dry THF (2 mL) and dry *N*, *N* DMF (0.5 mL) was stirred for 3h. The solvent was evaporated and the crude product was purified by column chromatography (methylene chloride:ethyl acetate - 10:1, then methylene chloride:methanol -10:1) on silica gel to afford the benzyl ester of **12**, **12-Bn**, (18 mg, 0.0165 mmol, 25% yield) as a white solid. Pd/C (3 mg) was added to a solution of **12-Bn** (18 mg, 0.0165 mmol) in methanol (1 mL), ethyl acetate (1 mL) and methylene chloride (1 mL). After stirring under an atmosphere of H2 for 2h, the mixture was filtered in the presence of 1% of triethylamine, the solvent was evaporated and the crude product was purified by preparative TLC (methylene chloride:methanol -10:1) to afford **12** (5 mg, 0.005 mmol, 30% yield) as a white solid. 1H NMR (400 MHz, *d*6-DMSO):  = 7.54 (2H, d, *J* = 8.5 Hz), 7.40 (10H, d, *J* = 8.5 Hz), 7.28 (4H, d, *J* = 8.5 Hz), 7.14-7.07 (10H, m), 7.04 (2H, d, *J* = 8.5 Hz), 3.97 (10H, s), 3.88 (2H, s), 3.54 (2H, s), 2.02 (3H, s); HR-MS: calcd. for C58H47O15N[Na+]: 1020.272, found: 1020.2725 HPLC-trace: 15 min for **12** when eluted with 56% acetonitrile / water containing 0.1% TFA (flow = 1.3 ml/min, =276 nm).

**Kinetic analysis:**

*Kinetic assays* were measured at pH 6.7 (50 mM PIPES, 50 mM NaCl with 5% DMSO as co-solvent) at room temperature. Kinetic assays were followed using reversed-phase HPLC by observing the formation of 4-acetamidophenyl acetic acid **5** and 4-hydroxyphenylacetic acid **3** at  = 276 nm [CH3CN / H2O (0.1% TFA) 8:92 mobile phase, flow = 1.5 ml/min, with 4-methoxyphenol as an internal standard (IS)] or by observing the formation of **7** and **8** at  = 276 nm [CH3CN / H2O (0.1% TFA) 35:65 mobile phase, flow = 1.0 ml/min, with anisole as an internal standard (IS)] . Reactions were performed at 100 - 750 µM substrate (**2b**, **6**, **7**, **8**)concentrations and 5 µM antibody OB2-48F8 (purified by protein-G affinity and mono-Q ion-exchange column chromatography) concentration. At appropriate times during the assay an aliquot (11 µL) of the reaction mixture was removed and added to an equal volume of IS solution (100 µM in water). This mixture was then analyzed by HPLC *vide supra*. The assay was followed for no more than 5 % of the reaction progress, during which time the progress curves were linear (r2 > 0.985). The non-catalyzed rates, *k*uncat, of trimer **6**, dimers **7** and **8** as well as ester **2b** are 1.37 x 10-5 min-1, 1.45 x 10-5 min-1, 2.20 x 10-5 min-1 and 3.05 x 10-5 min-1, respectively, and were determined by the method of initial rates using the buffer system *vide supra*. Phosphorodithioate **9** is a tight-binding inhibitor of OB2-48F8 (5µM) with a *K*i = 6.2 µM for **5** and a *K*i = 16.5 µM for **2b**, respectively.
